# Supplementary material for: Automated multiplex genome-scale engineering in yeast
Source: PubMed Central journal article supplement (PMC5418614; doi:10.1038/ncomms15187), 2017-05-04
Supplement: ncomms15187-s1.pdf [file ncomms15187-s1.pdf]

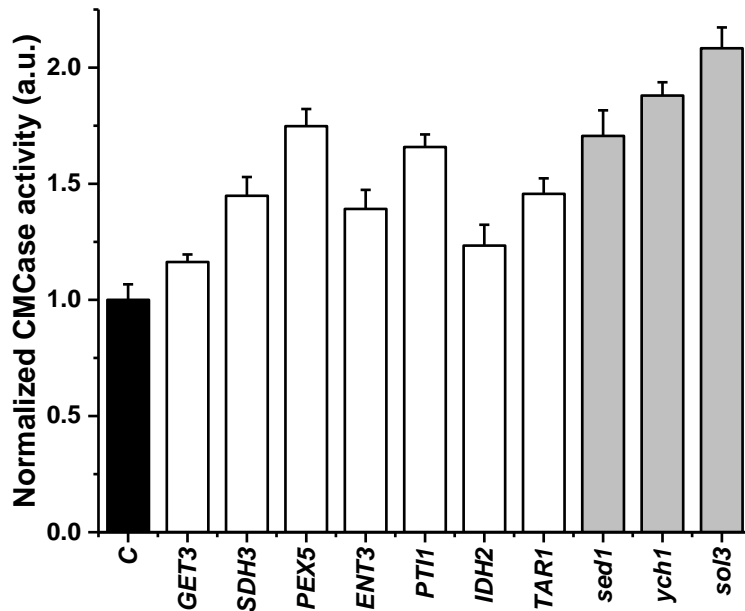

**Supplementary Figure 1 | Genetic mutations conferring improved EGII-display levels estimated using hydrolysis activities of carboxymethyl cellulose (CMC) substrates.** Overexpression and knockdown targets are listed as white and grey bars, respectively. *C* denotes the control strain (CAD-EGII) harboring an empty pRS416 plasmid. Error bars represent the mean  $\pm$  s.d. from biological replicates (n=3).

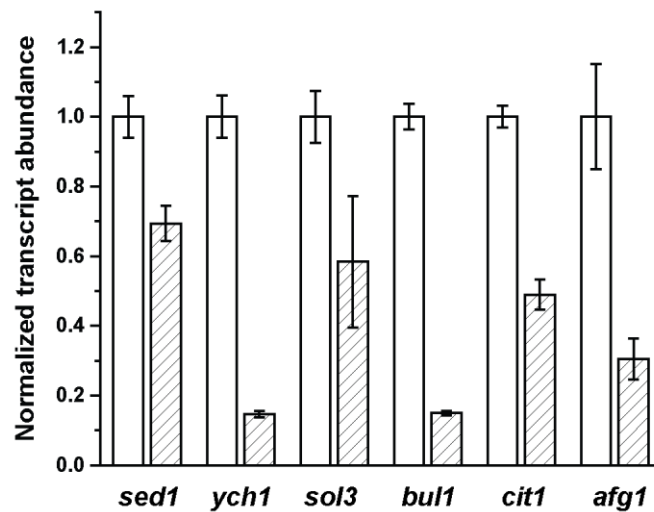

**Supplementary Figure 2 | Estimation of gene silencing efficiency in yeast mutants.** Genetic knockdown was mediated by plasmids containing expression cassettes of full-length antisense mRNAs on a pRS416 backbone. Transcript abundance of the knockdown mutants (patterned bars) was normalized to the control strains (no pattern bars) containing an empty pRS416 plasmid. The *ACT1* gene was used as the internal control for RT-qPCR experiments. Averages are defined as the central values, and error bars represent the mean  $\pm$  s.d. from biological replicates (n=3, and technical triplicates were included for each sample).

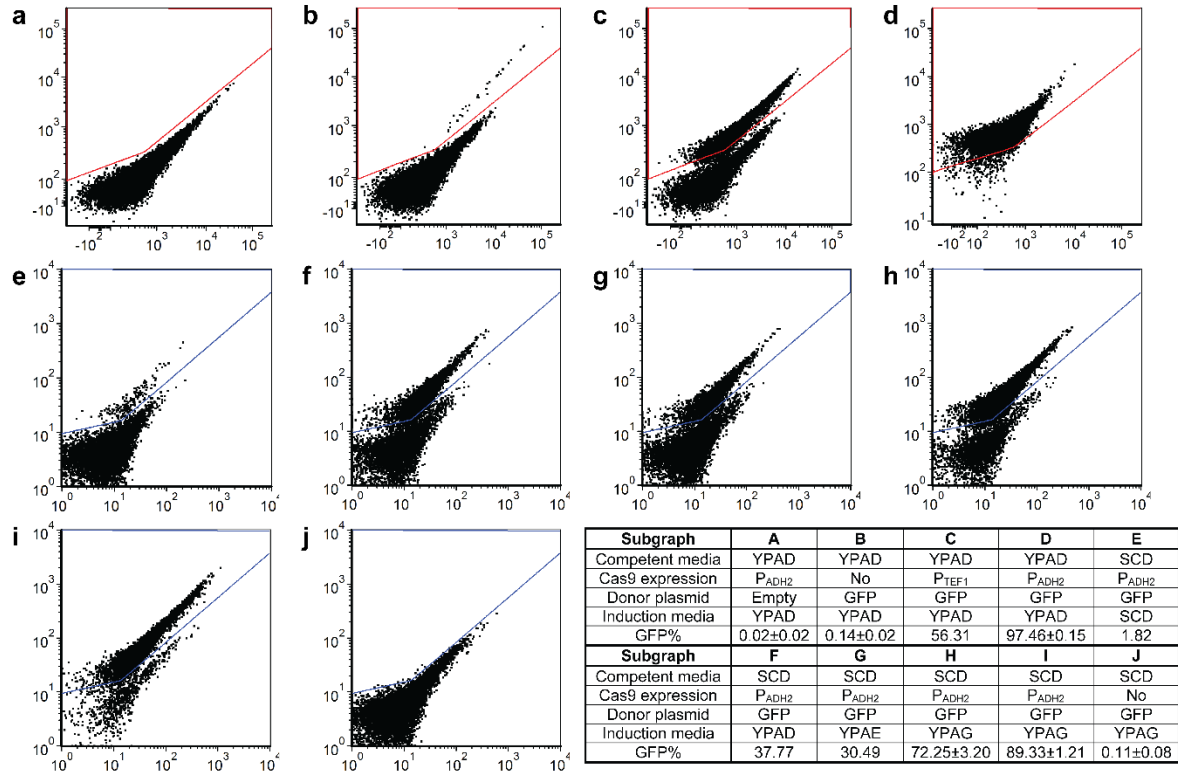

**Supplementary Figure 3 | CRISPR-assisted  $\delta$  integration of a GFP reporter.** Representative flow cytometry plots are provided for quantification of GFP-positive populations by depicted gates after donor plasmid curation. The y-axis denotes GFP fluorescence, while the x-axis denotes yeast cell autofluorescence measured using a phycoerythrin (PE) channel. **(a-d)** In earlier designs, YPAD was used to prepare competent cells. Only few transformants ( $<10^2$  CFUs per  $\mu\text{g}$  plasmid DNA) can be obtained after plasmid transformation, probably due to the fact that P<sub>ADH2</sub> is not strictly repressed by glucose in rich medium. **(e-j)** Higher transformation efficiency ( $\sim 10^4$  CFUs per  $\mu\text{g}$  plasmid DNA) was achieved using synthetic medium with glucose (SCD) for competent cell preparation, although integration efficiency was reduced by about three-fold **(d and f)**. **(a)** Negative control with the CAD-P<sub>ADH2</sub>-Cas9 strain and an empty donor plasmid. **(b)** Small GFP positive population with the CAD strain (without Cas9 expression) and the GFP donor plasmid. GFP fluorescence may be resulted from  $\delta$  integration or incomplete plasmid curation. **(c)** and **(d)** High percentiles of GFP positive population enabled with Cas9 expression and the GFP donor. Higher integration efficiency was achieved when Cas9 was expressed from P<sub>ADH2</sub> compared with P<sub>TEF1</sub>, and hence the CAD-P<sub>ADH2</sub>-Cas9 strain was used for later studies. **(e)-(h)** Optimization of induction media. Different media types (synthetic medium and rich media) and carbon sources (D: 2% glucose, E: 2% ethanol, G: 2% galactose) were examined. YPAG was chosen as the best induction medium. **(i)** The second round of integration with the GFP donor plasmid using cells from **(h)** as parent. **(j)** Two rounds of integration with the GFP donor plasmid in the CAD strain (without Cas9 expression). A table was provided to summarize experiment conditions and statistics from **(a-j)**. Error bars represent the mean  $\pm$  s.d. from biological replicates (n=3). Average values without error bars are calculated from biological replicates (n=2). Two independent experiments were performed for all panels.

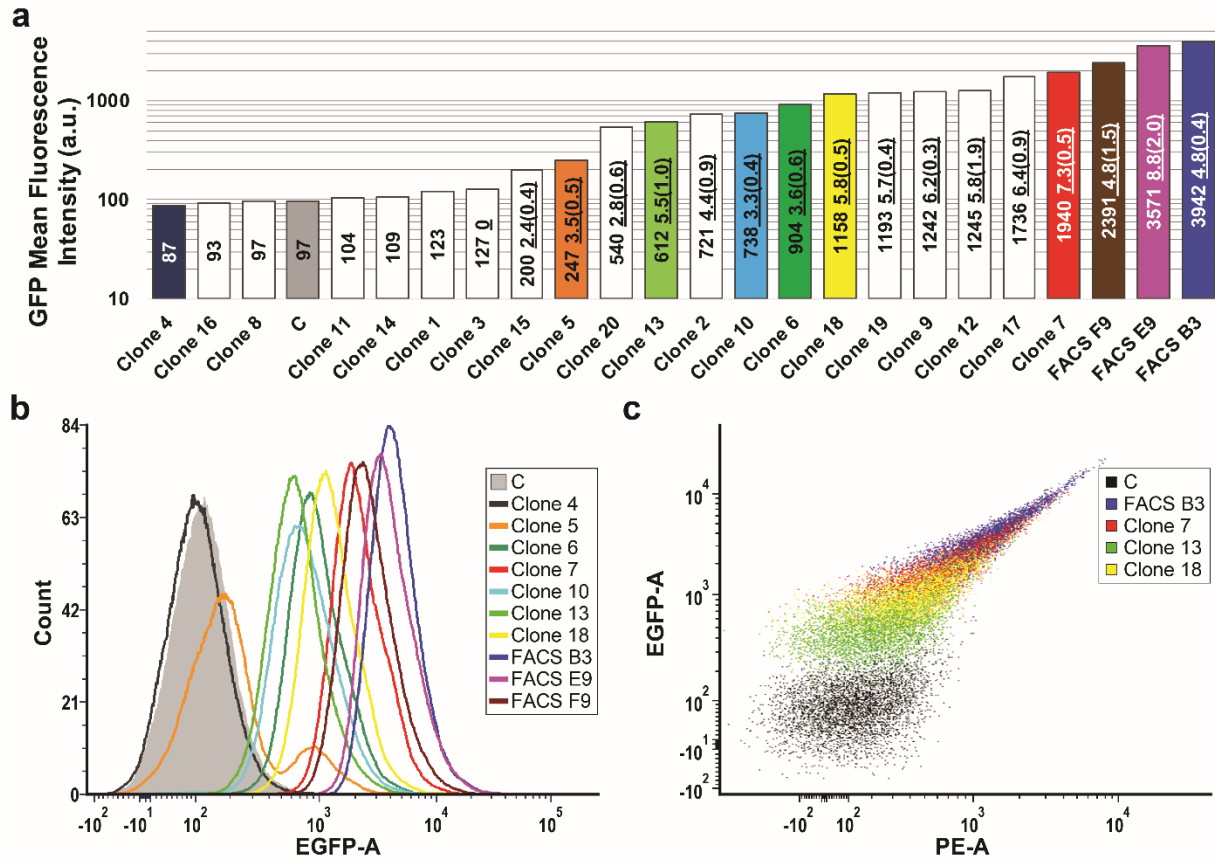

**Supplementary Figure 4 | Characterization of individual clones after CRISPR-assisted  $\delta$  integration of a GFP reporter.** From the cell population after the first round of integration (**Round 1** in **Fig. 3c** and **Supplementary Fig. 3h**), individual clones were isolated either randomly after streaking on an agar plate (denoted as Clone #) or using FACS (denoted as FACS #). Twenty randomly picked clones and the top 3 brightest clones from FACS are presented. For brevity and clarity, only selected clones from panel (a) are included in (b) and (c), and the same color code is used in (a)-(c). (a) Mean GFP fluorescence intensities by flow cytometry. Clones with GFP fluorescence higher than Clone 3 were considered GFP-positive based on histogram and qPCR results. Mean GFP intensity values are in the normal font, and integration copy numbers quantified using qPCR are underlined with the format of mean(s.e.m) (b) Histogram results of flow cytometry. (c) Dot plots of flow cytometry. Two independent flow-cytometry experiments were performed with similar trends observed. For qPCR, technical replicates (n=3) of two template concentrations ( $3 \text{ ng } \mu\text{L}^{-1}$  and  $0.3 \text{ } \mu\text{g } \mu\text{L}^{-1}$ ) were performed using the *ALG9* gene as reference.

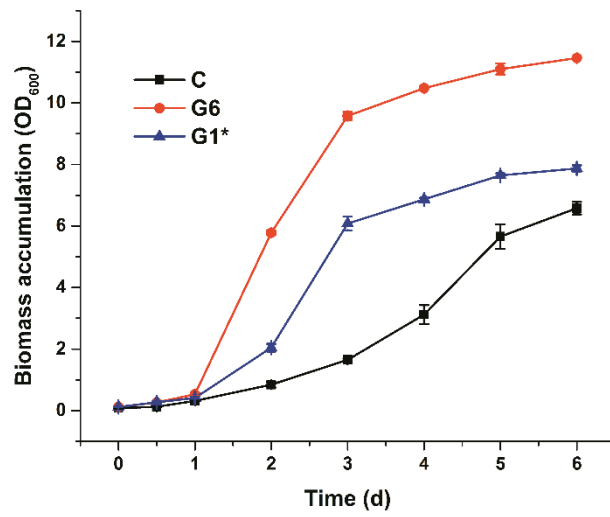

**Supplementary Figure 5 | Improved glycerol utilization by yeast mutants.** Error bars represent the mean  $\pm$  s.d. from biological replicates (n=3). Averages are plotted as center values. Two independent experiments were performed with the same trend observed.

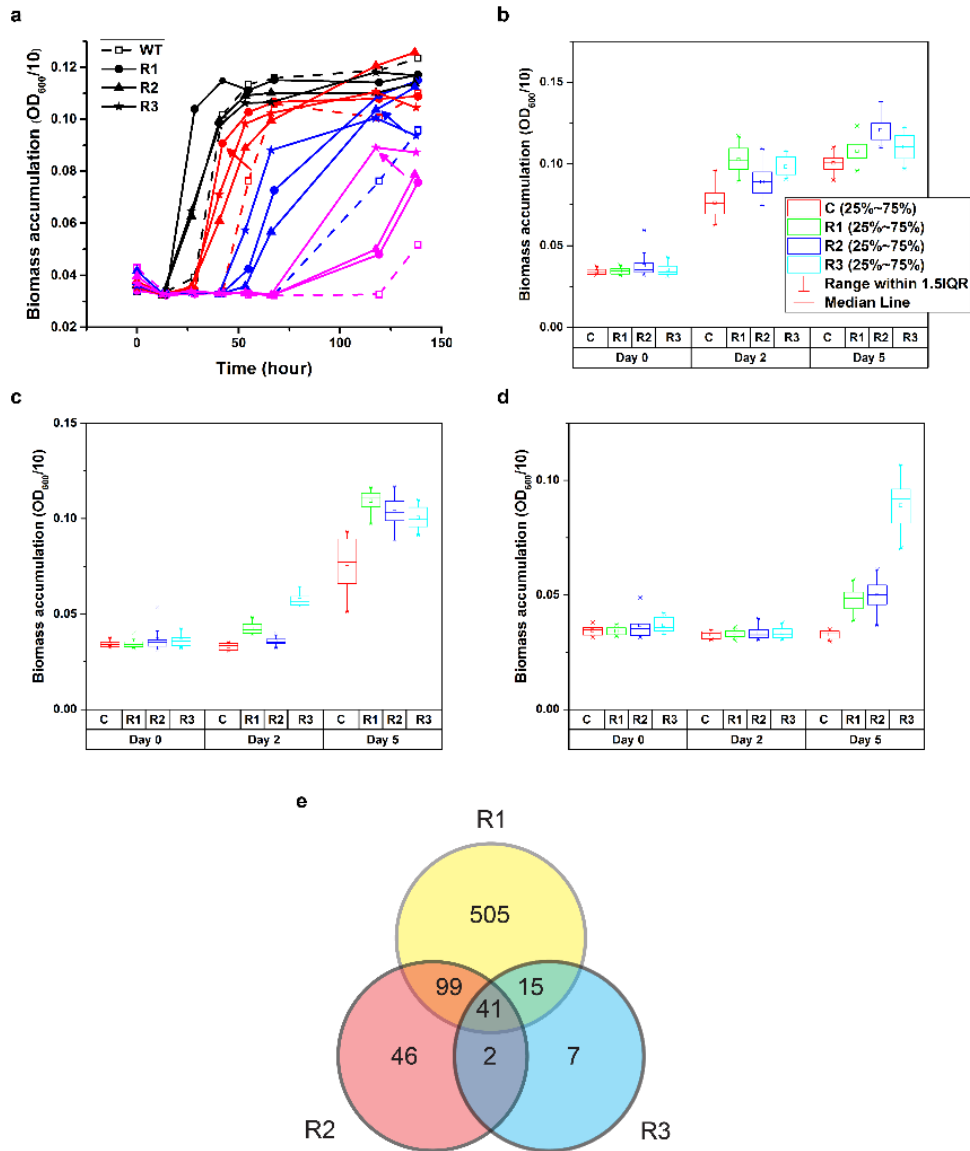

**Supplementary Figure 6 | Screening of yeast mutants with improved acetic acid (HAc) tolerance.** (a) The yeast libraries (solid line) and the control strain (dashed line) were cultivated aerobically in synthetic media supplemented with 0.8% (black), 0.9% (Red), 1.0% (blue) and 1.1% (magenta) HAc. Selection of cell cultures from the first (R1, red circle, 0.9%), second (R2, blue triangle, 1.0%) and third (R3, magenta star, 1.1%) rounds was indicated with arrows. Mean values from technical replicates ( $n=16$ ) are plotted. (b-d) Comparison of biomass accumulation of cell populations from different rounds in the presence of 0.9% (b), 1.0% (c) and 1.1% (d) (v/v) HAc. Box charts are generated from technical replicates ( $n=16$ ). (e) Numbers of integrated modulation parts in the first (R1), second (R2) and third (R3) round of screening (Supplementary Data 3).

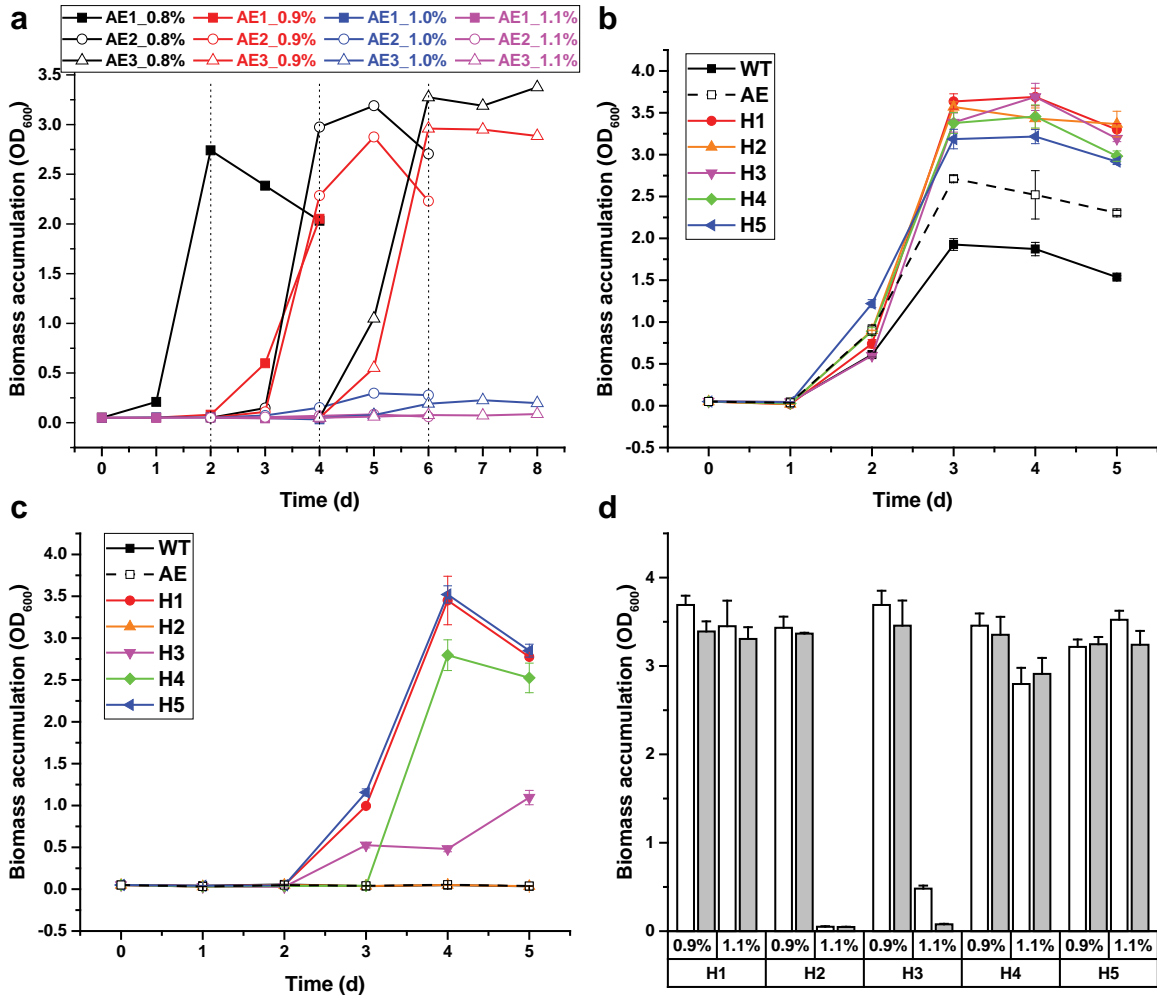

**Supplementary Figure 7 | Cell growth of engineered yeast strains in HAc media.** (a) Three rounds of adaptive evolution for the CAD-Cas9 parent strain were performed in SC media (pH=4) with 0.8% (black), 0.9% (Red), 1.0% (blue) and 1.1% (v/v) (magenta) HAc. Selection of cell cultures from the first (AE1, black square, 0.8%), second (AE2, red circle, 0.9%) and third (AE3, red triangle, 0.9%) rounds was indicated with vertical dashed lines. (b) Comparison of biomass accumulation of the parent strain (WT), adaptive population (AE) and individual mutant clones (H#) in the presence of 0.9% (v/v) HAc. (c) Comparison of biomass accumulation of the parent strain, adaptive population and individual mutant clones in the presence of 1.1% (v/v) HAc. (d) Strain stability test. For the individual clones (H1-H5) isolated after the third round of automated engineering, biomass accumulation in 0.9% and 1.1% (v/v) HAc media after 4 days was examined before (white) and after (grey) 100 generations of cell division in non-selective SC media. The same cultivation condition was used in (d) as in (b) and (c). Error bars represent the mean  $\pm$  s.d. of technical replicates (n=3) and biological replicates (n=3) for adaptive population and all other strains, respectively.

| Functional class                  | R1 | R2 | R3 | K |
|-----------------------------------|----|----|----|---|
| Metabolism of amines              |    |    |    |   |
| Protease inhibitor                |    |    |    |   |
| Proteasomal degradation           |    |    |    |   |
| Ion transport                     |    |    |    |   |
| Oxygen and radical detoxification |    |    |    |   |
| Ribosome biogenesis               |    |    |    |   |
| Translation                       |    |    |    |   |
| Biogenesis of mitochondrion       |    |    |    |   |

**Supplementary Figure 8 | Functional clustering and statistics of integrated cassettes from different rounds of HAc tolerance screening.** Genes enriched in each round were listed in **Supplementary Data 3**. Gene ontology enrichment analysis was performed according to the MIPS functional catalogue. R1, R2, R3 and K denote the first, second, third rounds of HAc engineering and known HAc resistance-relevant functional classes<sup>1</sup>.



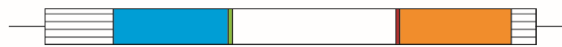

TEF1p-15bp-1-cDNA-15bp-2-PGK1t

PCR library construction

|                    | Extra bp | Tail (M13 F)                 | Barcode                                                            | PBS (TEF1p)                                                       | 15 bp-1                                                             | 15 bp-2                                                                   | PBS (PGK1t)                                                     |
|--------------------|----------|------------------------------|--------------------------------------------------------------------|-------------------------------------------------------------------|---------------------------------------------------------------------|---------------------------------------------------------------------------|-----------------------------------------------------------------|
| PRO index primer F | 5'       | AGTAACGCCAGGTTTCCCGAGTCACGAC | GCATTGGGCGTTGCATAGCAATCTAATCTAAG                                   | .....AGAAA GCATAGCAATCTAATCTAAGTTTAAATTACAA AAGCAGTGGTATCAA ..... | .....cDNA.....cDNA.....TCTCATCGTACCCCGATTGAATTGAAATCGATAGATCAA..... | .....cDNA.....cDNA.....AGAGTAGCATGGGGCTAAC TTAACCTAACCTTAGCTATCTAGTT..... | C TTAACCTAACCTTAGCTATC 5'                                       |
| PCR Prpduct        |          | AGTAACGCCAGGTTTCCCGAGTCACGAC | GCATTGGGCGTTGCATAGCAATCTAATCTAAGTTTAAATTACAA AAGCAGTGGTATCAA ..... | .....cDNA.....cDNA.....TCTCATCGTACCCCGATTGAATTGAAATCGATAG         | TCATTGCGTCCAAAAGGGTCAGTGTG                                          | CGTAAGCCGCAA CGTATCGTTAGATTAGATTC AAAATTAATGTT TTCGTCACCATAGTT .....      | .....cDNA.....cDNA.....AGAGTAGCATGGGGCTAAC TTAACCTAACCTTAGCTATC |

Normal TruSeq library construction

PCR Primer 1.0 (TruSeq libraries)

5' AATGATACGGCGACCACCGA GATCTACACTCTTCCCTACACGA

GATCTACACTCTTCCCTACACGAGGCTCTCCGATCTAGTAACGCCAGGTTTCCCGAGTCACGAC GCATTGGGCGTTGCATAGCAATCTAATCTAAGTTTAAATTACAA AAGCAGTGGTATCAA .....

PCR Primer 1.0 (TruSeq libraries)

AATGATACGGCGACCACCGA GATCTACACTCTTCCCTACACGA

GATCTACACTCTTCCCTACACGAGGCTCTCCGATCT .....

Custom TruSeq library construction

PCR Primer 1.0 custom1 (TruSeq libraries)

5' AATGATACGGCGACCACCGA GATCTACACTCTTCCCTACACGAGGCTCTCCGATCT CCAGGTTTCCCGAGTCACGAC

AGTAA CGCAGGTTTCCCGAGTCACGAC GCATTGGGCGTTGCATAGCAATCTAATCTAAGTTTAAATTACAA AAGCAGTGGTATCAA .....

Sequencing Primer (TruSeq libraries)

5' ACACCTCTTCCCTACACGAGGCTCTCCGATCT

Index Read Primer (TruSeq libraries)

GATCGGAAGAGCACACGTCTGAACTCCAGTCAC

AATGATACGGCGACCACCGA GATCTACACTCTTCCCTACACGAGGCTCTCCGATCT CCAGGTTTCCCGAGTCACGAC GCATTGGGCGTTGCATAGCAATCTAATCTAAGTTTAAATTACAA AAGCAGTGGTATCAA .....

P5

P7

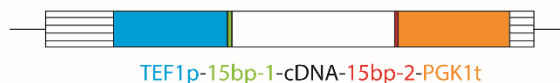

**PCR library construction**

TER universal primer R  
 5' GCATAGCAATCTAATCTAAG  
 .....AGAAA GCATAGCAATCTAATCTAAG TTTTAANTACAA AAGCAGTGGTATCAA .....cDNA.....cDNA..... TCTCATCGTACCCCG ATTGAATTGAATTGAAATCGATAGATCAA.....  
 .....TCTTTT CGTATCGTTAGATTAGATTC AAAATTAATGTT TTCGTCACCATAGTT .....cDNA.....cDNA..... AGAGTAGCATGGGGCTAACTTAACCTTAAGCTATCTAGTT.....  
 TAACTTAACTTAACTTTAGC TTGCGGCTTACGCAGCACTGACCCCTTTGGACCGCAATGA 5' TER index primer F  
 PBS (PGK1t) Barcode Tail (M13 F) Extra bp

PCR product  
 GCATAGCAATCTAATCTAAG TTTTAANTACAA AAGCAGTGGTATCAA .....cDNA.....cDNA..... TCTCATCGTACCCCG ATTGAATTGAATTGAAATCG AACGCCGAATGCGTCGTGACTGGGAAAACCTGGCTTACT  
 CGTATCGTTAGATTAGATTC AAAATTAATGTT TTCGTCACCATAGTT .....cDNA.....cDNA..... AGAGTAGCATGGGGCTAACTTAACCTTTAGC TTGCGGCTTACGCAGCACTGACCCCTTTGGACCGCAATGA

PCR product  
 AGTAA CGCAGGTTTCCCGATCAGCAGCGCATTCGGCGTT CGATTTC AATTC AATTC AAT CGGGGTACGATGAGA .....cDNA.....cDNA..... TTGATCCACTGCTT TGTAATTA AAAA CTAGATTAGATTGCTATGC  
 Equivalent in reverse direction TCATTGCGTCCAAAAGGGTCAGTCTGCGTAAGCCGCAAGCTAAAGTTAAGTTAAGTTA GCCCATGCTACTCT .....cDNA.....cDNA..... AACTATGGTGACGAA AACATTAATTTT GAATCTAATCTAACGATACG

---

**Custom TruSeq library construction**

PCR Primer 1.0 custom 1 (TruSeq libraries)  
 5' AATGATACGGCGACCACCGA GATCTACACTCTTCCCTACACGACGCTCTCCGATCT CCAGGTTTCCCGATCAGCAGC  
 AGTAA CGCAGGTTTCCCGATCAGCAGCGCATTCGGCGTT CGATTTC AATTC AATTC AAT CGGGGTACGATGAGA .....cDNA.....AGATCGGAAGAGCACACGCTGAACTCCAGTCAC\_NNNNNN\_ATCTCGTATGCCGCTTCTGCTTG  
 TCATTGCGTCCAAAAGGGTCAGTCTGCGTAAGCCGCAAGCTAAAGTTAAGTTAAGTTA GCCCATGCTACTCT .....cDNA.....TCTAGCCTTCTCGTGTGCAGACTTGAGGTCAGTG\_NNNNNN\_TAGAGCATACGGCAGAAGACGAAC  
 TAGAGCATACGGCAGAAGACGAAC 5'  
 PCR Primer 2.0 (TruSeq libraries)

Sequencing Primer (TruSeq libraries)  
 5' AACTCTTCCCTACACGACGCTCTCCGATCT  
 AATGATACGGCGACCACCGA GATCTACACTCTTCCCTACACGACGCTCTCCGATCT CCAGGTTTCCCGATCAGCAGCGCATTCGGCGTT CGATTTC AATTC AATTC AAT CGGGGTACGATGAGA .....cDNA..... AGATCGGAAGAGCACACGCTGAACTCCAGTCAC\_NNNNNN\_ATCTCGTATGCCGCTTCTGCTTG  
 TTACTATGCCGCTGCTGCTCTAGATGTGAGAAAGGGATGTGCTGCGAGAGGGCTAGA CGTCCAAAAGGGTCAGTCTGCGTAAGCCGCAAGCTAAAGTTAAGTTAAGTTA GCCCATGCTACTCT .....cDNA..... TCTAGCCTTCTCGTGTGCAGACTTGAGGTCAGTG\_NNNNNN\_TAGAGCATACGGCAGAAGACGAAC  
 P5 P7

**Supplementary Figure 9 | Scheme of modified TruSeq workflow for NGS analysis of PCR libraries.** The designs to enrich junction fragments near the promoter and terminator are explained in (a) and (b), respectively. The color code—cyan: promoter; orange: terminator; green: 15 bp handle#1; red: 15 bp handle#2; Indigo: custom sequence M13F; purple: 12 bp barcode; brown: Truseq adaptors; blue: sequence to bind flow cells. PCR library construction shows the process to PCR-amplify modulation parts either from plasmid or genomic DNA samples. Normal TruSeq library construction shows the results when the original PCR primers “PCR Primer 1.0” and “PCR Primer 2.0” were used to construct the shotgun DNA libraries. Custom TruSeq library construction shows enrichment of junction fragments and inclusion of compatible sequences for the Truseq protocol via the use of a custom primer “PCR Primer 1.0 custom1”. “Sequencing Primer” and “Index Read Primer” are original sequences from the Truseq kit.

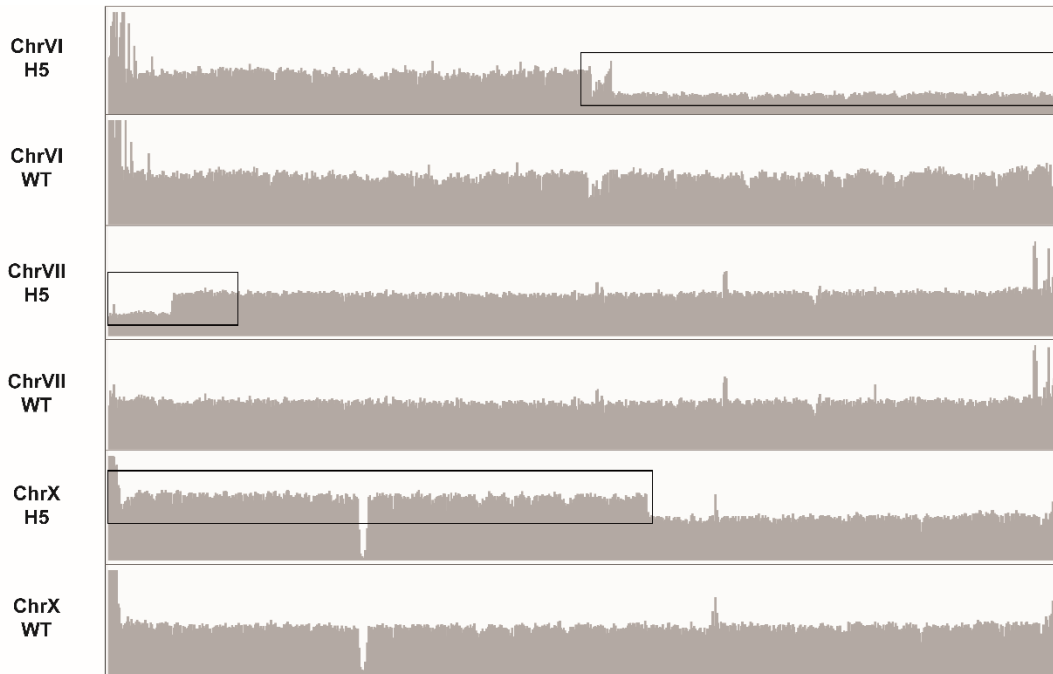

**Supplementary Figure 10 | Large-scale genomic rearrangement in the H5 mutant visualized by read coverage in Integrative Genomics Viewer<sup>2</sup>.**

**Supplementary Table 1 | Insets of 20 random plasmids from the modulation part library**

| Overexpression library |                 | Knockdown library |                 |
|------------------------|-----------------|-------------------|-----------------|
| Gene name              | ORF length (bp) | Gene name         | ORF length (bp) |
| <i>CBK1</i>            | 2271            | <i>RPS4A</i>      | 786             |
| <i>OLE1</i>            | 1533*           | <i>TOS6</i>       | 309             |
| <i>RPS8B</i>           | 604             | <i>INH1</i>       | 258             |
| <i>HSC82</i>           | 2118            | <i>KAR2</i>       | 2049            |
| <i>SCD6</i>            | 1050            | <i>GPM1</i>       | 744             |
| <i>ATP17</i>           | 306             | <i>SPI1</i>       | 447             |
| <i>UFD1</i>            | 1086            | <i>SSA4</i>       | 1929            |
| <i>HSP26</i>           | 645             | <i>RIB4</i>       | 510             |
| <i>LSP1</i>            | 1026            | <i>GIM3</i>       | 390             |
| <i>HTB1</i>            | 396             | <i>PIL1</i>       | 1020            |

\* A fragment (1-264bp) of the *OLE1* ORF was cloned. The fragment had the characteristic poly-A tail in an mRNA molecule, indicating a premature transcriptional stop instead of inability of the cDNA synthesis kit to amplify the 5' end of the mRNA for cloning a full-length cDNA.

**Supplementary Table 2 | Serial transfer to enrich yeast mutants with enhance NVA resistance and glycerol utilization.**

| Round | Norvaline resistance |                                            |         |              | Glycerol utilization |                                         |         |  |
|-------|----------------------|--------------------------------------------|---------|--------------|----------------------|-----------------------------------------|---------|--|
|       | Concentration (g/L)  | Time to reach OD <sub>600</sub> =2.5 (day) |         | Inoculum (%) |                      | Time to reach OD <sub>600</sub> =1(day) |         |  |
|       |                      | Library                                    | Control | Library      | Control              | Library                                 | Control |  |
| 1     | 4                    | 1.5                                        | 2.5     | 1            | 1                    | 2.5                                     | 3.5     |  |
| 2     | 4                    | 1                                          | 1.5     | 1            | 1                    | 2                                       | 3       |  |
| 3     | 4                    | 1                                          | 1.5     | 1            | 1                    | 2                                       | 2.5     |  |
| 4     | 5                    | 1                                          | 1.5     | 0.1          | 1                    | 2.5                                     | 2.5     |  |
| 5     | 5                    | 1                                          | 1.5     | 0.1          |                      | 1.5                                     |         |  |
| 6     | 6                    | 1                                          | 1.5     |              |                      |                                         |         |  |
| 7     | 6                    | 1                                          | 1       |              |                      |                                         |         |  |

**Supplementary Table 3 | Known gene functions targeted by isolated modulation parts.**

| Gene                     | Description (www.yeastgenome.com)                                                                                                                                                                                                                                                                                                                                                                                                                                            |
|--------------------------|------------------------------------------------------------------------------------------------------------------------------------------------------------------------------------------------------------------------------------------------------------------------------------------------------------------------------------------------------------------------------------------------------------------------------------------------------------------------------|
| <i>get3</i>              | Guanine nucleotide exchange factor for Gpa1p; amplifies G protein signaling; functions as a chaperone under ATP-depleted oxidative stress conditions; subunit of GET complex, involved in ATP dependent Golgi to ER trafficking and insertion of tail-anchored (TA) proteins into ER membrane under non-stress conditions; binds as dimer to transmembrane domain (TMD) cargo, shielding TMDs from aqueous solvent; protein abundance increases under DNA replication stress |
| <i>sdh3</i>              | Subunit of succinate dehydrogenase and of TIM22 translocase; functions as cytochrome b subunit of succinate dehydrogenase, which couples oxidation of succinate to transfer of electrons to ubiquinone as part of the TCA cycle and the mitochondrial respiratory chain; also required for mitochondrial inner membrane protein import as part of the TIM22 complex                                                                                                          |
| <i>pex5</i>              | Peroxisomal membrane signal receptor for peroxisomal matrix proteins; receptor for the C-terminal tripeptide signal sequence (PTS1) of peroxisomal matrix proteins; required for peroxisomal matrix protein import; also proposed to have PTS1-receptor independent functions                                                                                                                                                                                                |
| <i>ent3</i>              | Protein containing an N-terminal epsin-like domain; involved in clathrin recruitment and traffic between the Golgi and endosomes; associates with the clathrin adaptor Gga2p                                                                                                                                                                                                                                                                                                 |
| <i>pti1</i>              | Essential component of CPF (cleavage and polyadenylation factor); involved in 3' end formation of snoRNA and mRNA; interacts directly with Pta1p; relocalizes to the cytosol in response to hypoxia; similar to mammalian Cleavage-Stimulation Factor CstF-64                                                                                                                                                                                                                |
| <i>idh2</i>              | Subunit of mitochondrial NAD(+)-dependent isocitrate dehydrogenase; complex catalyzes the oxidation of isocitrate to alpha-ketoglutarate in the TCA cycle; phosphorylated                                                                                                                                                                                                                                                                                                    |
| <i>tar1</i>              | Protein potentially involved in regulation of respiratory metabolism; located in the mitochondria; interacts genetically with RPO41 and physically with Coq5p; encoded within the 25S rRNA gene on the opposite strand                                                                                                                                                                                                                                                       |
| <i>sed1</i> <sup>#</sup> | Major stress-induced structural GPI-cell wall glycoprotein; associates with translating ribosomes, possible role in mitochondrial genome maintenance; ORF contains two distinct variable minisatellites                                                                                                                                                                                                                                                                      |
| <i>ych1</i>              | Phosphatase with sequence similarity to Cdc25p; Arr2p and Mih1p; member of the single-domain rhodanese homology superfamily                                                                                                                                                                                                                                                                                                                                                  |
| <i>sol3</i>              | 6-phosphogluconolactonase; catalyzes the second step of the pentose phosphate pathway; weak multicopy suppressor of <i>los1-1</i> mutation                                                                                                                                                                                                                                                                                                                                   |
| <i>bul1</i> <sup>§</sup> | Ubiquitin-binding component of the Rsp5p E3-ubiquitin ligase complex; disruption causes temperature-sensitive growth; overexpression causes missorting of amino acid permeases                                                                                                                                                                                                                                                                                               |
| <i>cit1</i> <sup>*</sup> | Citrate synthase; catalyzes the condensation of acetyl coenzyme A and oxaloacetate to form citrate; the rate-limiting enzyme of the TCA cycle; nuclear encoded mitochondrial protein                                                                                                                                                                                                                                                                                         |
| <i>afg1</i>              | Protein that may act as a chaperone for cytochrome c oxidase subunits; conserved protein; may act as a chaperone in the degradation of misfolded or unassembled cytochrome c oxidase subunits; localized to matrix face of the mitochondrial inner membrane; member of the AAA family but lacks a protease domain                                                                                                                                                            |

<sup>#</sup>The *SEDI* gene encodes a stress-induced structural cell wall protein Sed1p, which is anchored on the cell surface through a glycosylphosphatidylinositol (GPI) domain<sup>3</sup>. It has been shown that the use of the Sed1p anchoring domain enabled efficient surface display of heterologous proteins in yeast<sup>4</sup>, suggesting high displaying levels of Sed1p. Hence, it is possible that suppressed Sed1p expression can improve the capacity of cell surface to accommodate other cell wall proteins, including the EGII-agglutinin fusion.

<sup>\*</sup>The knockdown cassette of *CIT1* targeted the tricarboxylic acid (TCA) pathway, and reduced TCA activities has been linked to fast glycerol metabolism in *E. coli*<sup>5</sup>.

<sup>§</sup>Knockdown of the *BUL1* gene may lead to mistargeting of the general amino acid permease Gap1p, and reduced expression of the Gap1p was found to increase isobutanol titer<sup>6</sup>

**Supplementary Table 4 | Multiplex integration cassettes from yeast mutants engineered using the biological foundry**

| G6             |                | G1*            |                |                | H5             |                |
|----------------|----------------|----------------|----------------|----------------|----------------|----------------|
|                |                | YAL033W        | <u>YKR070W</u> | YLR262C-A      | YAL033W        | <u>YKR070W</u> |
|                |                | YBR009C        | YKR095W        | <u>YML028W</u> | YBR009C        | YKR095W        |
| <u>YBR082C</u> | <u>YLR204W</u> | <u>YBR010W</u> | YLL009C        | YML030W        | <u>YBR010W</u> | YLL009C        |
| YDL125C        | <u>YML028W</u> | <u>YDL136W</u> | YLR287C-A      | YMR117C        | <u>YDL136W</u> | YLR287C-A      |
| YDR063W        | YMR119W        | YDL184C        | <u>YML028W</u> | YMR193W        | YDL184C        | <u>YML028W</u> |
| YDR296W        | YMR193W        | YDL191W        | <u>YMR117C</u> | YNL055C        | YDL191W        | <u>YMR117C</u> |
| YEL052W        | <u>YOL016C</u> | YDR050C        | YMR193W        | <u>YNR001C</u> | YDR050C        | YMR193W        |
| YER158W-A      | YOL143C        | YDR363W-A      | <u>YNR001C</u> | <u>YOL016C</u> | YDR363W-A      | <u>YNR001C</u> |
| YHR005C        | YOR020C        | YEL052W        | YOR020C        | YOR020C        | YEL052W        | YOR020C        |
| YJL144W        | <u>YOR293W</u> | YER030W        | YPL225W        | YPL037C        | YER030W        | YPL225W        |
|                |                | <u>YGR076C</u> | YPR010C-A      | YPR010C-A      | <u>YGR076C</u> | YPR010C-A      |
|                |                | YGR243W        |                | YPR151C        | YGR243W        |                |

Overexpression cassettes were underlined. Blue font indicates both overexpression and knockdown parts were identified, a phenomenon that was also observed in a previous report isolating both up- and down-regulation of the same gene in a genome-wide screening in *E. coli*<sup>7</sup>. All others are knockdown cassettes.

**Supplementary Table 5 | DNA sequences included in this study**

| <b>Primer sequences for cloning</b> |                                                                                                                                                                                                                                                                                                                                                                                                                                                                                                                  |
|-------------------------------------|------------------------------------------------------------------------------------------------------------------------------------------------------------------------------------------------------------------------------------------------------------------------------------------------------------------------------------------------------------------------------------------------------------------------------------------------------------------------------------------------------------------|
| <b>Name</b>                         | <b>DNA sequence (5'→3')</b>                                                                                                                                                                                                                                                                                                                                                                                                                                                                                      |
| PR361                               | ATGACAAGGGTGACGCATTGG                                                                                                                                                                                                                                                                                                                                                                                                                                                                                            |
| PR362                               | CTAAACCCACACCGGGTG                                                                                                                                                                                                                                                                                                                                                                                                                                                                                               |
| PR364                               | ATCACGAGGCCCTTTTCTTTGAAAAGATAATGTATG                                                                                                                                                                                                                                                                                                                                                                                                                                                                             |
| PR365                               | CAGACAAGCTGTGACAGACATAAAAAACAAAAAAG                                                                                                                                                                                                                                                                                                                                                                                                                                                                              |
| PR346                               | AAACGAAGTTCTCCTCGAGGATATG                                                                                                                                                                                                                                                                                                                                                                                                                                                                                        |
| PR347                               | AAAACATATCCTCGAGGAGAACTTC                                                                                                                                                                                                                                                                                                                                                                                                                                                                                        |
| PR432                               | AATACCGCACAGATGCGTAAGGAGAAAATACCGCATCAGGGAAAGTTCTCCTCGAGG<br>ATATAGGTGTTGGAATAGAAAATCAACTATCATCTACTAAGTATTACACTACTAG<br>TATATTATCATATACGGTGTAGAAAGATGACGCAAATGATGAGAAATAGTCATCTAAA<br>TTAGTGGAAAGCTGAAACGCAAGGATTGATAATGTAATAGGATCAATGAATATAAACA<br>TATAAAATGATGATAATAATTTATAGAATTGTGTAGAATTGCAGATTCCCTTTTATG<br>GATTCCTAAATCCTTGAGGAGTTTAAACGAACTTCTAGTATATTCTGTATACCTAATATT<br>ATAGCCTTTATCAACAATGGAATCCCAACAATTATCTCAACATTCACCCATTTCTCAG<br>AAGTTCTCCTCGAGGATATAGGTCAGTCCCGCTTTCCAGTCGGGAAACCTGTCGTG<br>CCAGC |
| PR436                               | CCTGATGCGGTATTTCTCC                                                                                                                                                                                                                                                                                                                                                                                                                                                                                              |
| PR437                               | CCAGTCGGGAAACCTGTCTG                                                                                                                                                                                                                                                                                                                                                                                                                                                                                             |
| PR438                               | CGACAGGTTTCCCGACTGG                                                                                                                                                                                                                                                                                                                                                                                                                                                                                              |
| PR451                               | GATTCCTAAATCCTTGAGGAACACACCATAGCTTCAAATG                                                                                                                                                                                                                                                                                                                                                                                                                                                                         |
| PR452                               | ACAGAATATACTAGAAGTTCCAGGAAGAATACACTATAC                                                                                                                                                                                                                                                                                                                                                                                                                                                                          |
| PR511                               | CGGAAACCTGTCTGCCAGTAGGTCTAGAGATCTGTTTAGC                                                                                                                                                                                                                                                                                                                                                                                                                                                                         |
| PR512                               | GTTATGTTCAATTGGCAGATCATTAAGGGTCTCGAGAGC                                                                                                                                                                                                                                                                                                                                                                                                                                                                          |
| PR513                               | GCTCTCGAGAACCCTTAATGATCTGCCAATTGAACATAAC                                                                                                                                                                                                                                                                                                                                                                                                                                                                         |
| PR514                               | ATTCATTAATGCAGCCGCGGTCTTTCTGTATCGCAAATAAG                                                                                                                                                                                                                                                                                                                                                                                                                                                                        |
| PR515                               | CGGAAACCTGTCTGCCAGACATCCGAACATAAACAACC                                                                                                                                                                                                                                                                                                                                                                                                                                                                           |
| PR516                               | CCGCGGCTGCATTAATG                                                                                                                                                                                                                                                                                                                                                                                                                                                                                                |
| PR608                               | AGTTTTAATTACAAA AAGCAGTGGTATCAA GTTAAAC<br>CAGGAAGGGATGGCTGAGG                                                                                                                                                                                                                                                                                                                                                                                                                                                   |
| PR609                               | TCAATTC AATTCAAT CGGGGTACGATGAGA GTTAAAC<br>GAGCTCTAGAGATATCGTCG                                                                                                                                                                                                                                                                                                                                                                                                                                                 |
| PR610                               | AGTTTTAATTACAAA CGGGGTACGATGAGA GTTAAAC<br>CAGGAAGGGATGGCTGAGG                                                                                                                                                                                                                                                                                                                                                                                                                                                   |
| PR611                               | TCAATTC AATTCAAT AAGCAGTGGTATCAA GTTAAAC<br>GAGCTCTAGAGATATCGTCG                                                                                                                                                                                                                                                                                                                                                                                                                                                 |
| PR615                               | AATCTAAGTTTAAATTACAAAAGCAGTGG                                                                                                                                                                                                                                                                                                                                                                                                                                                                                    |
| PR616                               | TCGATTTCAATTCAATTCAATCGGGGTACG                                                                                                                                                                                                                                                                                                                                                                                                                                                                                   |
| PR617                               | AATCTAAGTTTAAATTACAAACGGGGTACG                                                                                                                                                                                                                                                                                                                                                                                                                                                                                   |
| PR618                               | TCGATTTCAATTCAATTCAATAAGCAGTGG                                                                                                                                                                                                                                                                                                                                                                                                                                                                                   |
| PR1001                              | AATCTAAGTTTAAATTACAAAATGAAGTTTTGATTGTCTTGTGGC                                                                                                                                                                                                                                                                                                                                                                                                                                                                    |
| PR1002                              | TTGGCGCTAGAACCTCCACCGCCACT                                                                                                                                                                                                                                                                                                                                                                                                                                                                                       |
| PR1003                              | GAGGTTCTAGCGCCAAAAGCTCTTTTATC                                                                                                                                                                                                                                                                                                                                                                                                                                                                                    |
| PR1004                              | CGATTTCAATTCAATTCAATTTAGAATAGCAGGTACGACAAAAG                                                                                                                                                                                                                                                                                                                                                                                                                                                                     |
| <b>Primers for qPCR</b>             |                                                                                                                                                                                                                                                                                                                                                                                                                                                                                                                  |
| ACT1 Rev                            | TCAAAGAAGCCAAGATAGAACCA                                                                                                                                                                                                                                                                                                                                                                                                                                                                                          |
| qPCR ACT1 For                       | AATTCGTTGTAGAAGGTATG                                                                                                                                                                                                                                                                                                                                                                                                                                                                                             |
| qPCR ACT1 Rev                       | ATACCTGGGAACATGGTGGT                                                                                                                                                                                                                                                                                                                                                                                                                                                                                             |



|               |                                  |
|---------------|----------------------------------|
| SED1 Rev      | GAAGAAGCAGAGGATGAAACT            |
| qPCR SED1 For | CCAACAGTACATCTGCTTCTTCCA         |
| qPCR SED1 Rev | TGTCGGATTCTGGAGCTTCAG            |
| YCH1 Rev      | AACGCCACAGATCGGGTAGG             |
| qPCR YCH1 For | ATACCTGGATCCGACTGAATTG           |
| qPCR YCH1 Rev | TGCCATCCGTCCTTGATATG             |
| SOL3 Rev      | CCAAAAGCTTCCTCATTAACG            |
| qPCR SOL3 For | TTTCTGAGAGGGCTAGTTTGAC           |
| qPCR SOL3 Rev | TCAAAGAGCCACCGCTAAC              |
| BUL1 Rev      | TACTCGAACGCAATAAAACC             |
| qPCR BUL1 For | TAGGCAGAAAACAAGAGGGTG            |
| qPCR BUL1 Rev | ATGAGAATGTGCTAGTTCGGG            |
| CIT1 Rev      | CGTAATCTGGGAAATGTTTC             |
| qPCR CIT1 For | TTTGGTTGCTTTTACTGGTG             |
| qPCR CIT1 Rev | TGGGAGGCTATCTAAAAGTTGG           |
| AFG1 Rev      | CTTCATCAAGAGCAAACATC             |
| qPCR AFG1 For | GCCGCAGAGATTGCAAATAAT            |
| qPCR AFG1 Rev | CGGATAGTAAGGCAGTCATCAG           |
| qPCR ALG9 For | CACGGATAGTGGCTTTGGTGAACAATTAC    |
| qPCR ALG9 Rev | TATGATTATCTGGCAGCAGGAAAGAACTTGGG |
| qPCR GFP For  | GATGGTGATGTTAATGGGCAC            |
| qPCR GFP Rev  | GGGTAAGTTTCCGTATGTTGC            |

| Primers for NGS analysis       |                           |                                                                       |                                                                      |
|--------------------------------|---------------------------|-----------------------------------------------------------------------|----------------------------------------------------------------------|
| Barcode name                   | Sample name               | PRO index primer F (5'→3')                                            | TER index primer F (5'→3')                                           |
| Color code for forward primers |                           | <b>extra bp-M13F-12bp barcode-Primer binding site (promoter)</b>      | <b>extra bp-M13F*-12bp barcode-Primer binding site (terminator)</b>  |
| 806rcbc1631                    | Integrated library        | AGTCACGCCAGGTTTTCCCAGTCACGA<br>CGGCAAGGCACAAGCATAGCAATCTAA<br>TCTAAG  | AGTCACGCCAGGTTTTCCCAGTCACGA<br>CGGCAAGGCACAACGATTTCAATTCAA<br>TTCAAT |
| 806rcbc1001                    | R1                        | AGTCACGCCAGGTTTTCCCAGTCACGA<br>CGGACCGCTTTCAGCATAGCAATCTAA<br>TCTAAG  | AGTCACGCCAGGTTTTCCCAGTCACGA<br>CGGACCGCTTTCAGCATTTCAATTCAAT<br>TCAAT |
| 806rcbc609                     | R2                        | AGTCACGCCAGGTTTTCCCAGTCACGA<br>CGCAAGCTGTCTCGCATAGCAATCTAA<br>TCTAAG  | AGTCACGCCAGGTTTTCCCAGTCACGA<br>CGCAAGCTGTCTCCGATTTCAATTCAAT<br>TCAAT |
| 806rcbc441                     | R3                        | AGTCACGCCAGGTTTTCCCAGTCACGA<br>CCATACACGCACCCGCATAGCAATCTAA<br>TCTAAG | AGTCACGCCAGGTTTTCCCAGTCACGA<br>CCATACACGCACCCGATTTCAATTCAA<br>TTCAAT |
| 806rcbc1333                    | H5                        | AGTCACGCCAGGTTTTCCCAGTCACGA<br>CGCATCTAAAGCCGCATAGCAATCTAA<br>TCTAAG  | AGTCACGCCAGGTTTTCCCAGTCACGA<br>CGCATCTAAAGCCGATTTCAATTCAA<br>TTCAAT  |
| 806rcbc930                     | Plasmid library           | AGTCACGCCAGGTTTTCCCAGTCACGA<br>CGCACTTCATTTCGCATAGCAATCTAAT<br>CTAAG  | AGTCACGCCAGGTTTTCCCAGTCACGA<br>CGCACTTCATTTCGATTTCAATTCAAT<br>TCAAT  |
| 806rcbc756                     | Glycerol Enriched plasmid | AGTCACGCCAGGTTTTCCCAGTCACGA<br>CACCGTCTTCTCGCATAGCAATCTAAT<br>CTAAG   | AGTCACGCCAGGTTTTCCCAGTCACGA<br>CACCGTCTTCTCCGATTTCAATTCAAT<br>TCAAT  |
| Reverse primer                 |                           | PRO universal primer R (5'→3')<br>CGATTTCAATTCAATTCAAT                | TER universal primer R (5'→3')<br>GCATAGCAATCTAATCTAAG               |

| Sequence features to determine modulation modes |                           |                                   |                                       |
|-------------------------------------------------|---------------------------|-----------------------------------|---------------------------------------|
| Modulation mode                                 | Combination               | DNA sequences of the combinations | Following sequence relative to an ORF |
| Overexpression                                  | P <sub>TEF1</sub> -15bp-1 | TTTTAATTACAAAAGCAGTGGTATCAA       | Upstream or the start                 |
|                                                 | T <sub>PGK1</sub> -15bp-2 | TCAATTCAATTCAATCGGGGTACGATGAGA    | Downstream or the end                 |
| Knockdown                                       | P <sub>TEF1</sub> -15bp-2 | TTTTAATTACAAACGGGGTACGATGAG       | Downstream or the end                 |
|                                                 | T <sub>PGK1</sub> -15bp-1 | TCAATTCAATTCAATAAGCAGTGGTATCAA    | Upstream or the start                 |

## Supplementary References

1. Mira, N.P., Palma, M., Guerreiro, J.F. & Sa-Correia, I. *Microb Cell Fact* **9**, 79 (2010).
2. Robinson, J.T. et al. *Nat Biotechnol* **29**, 24-26 (2011).
3. Shimoi, H., Kitagaki, H., Ohmori, H., Iimura, Y. & Ito, K. *J Bacteriol* **180**, 3381-3387 (1998).
4. Inokuma, K., Hasunuma, T. & Kondo, A. *Biotechnol Biofuels* **7**, 8 (2014).
5. Martinez-Gomez, K. et al. *Microb Cell Fact* **11**, 46 (2012).
6. Dundon, C.A., Smith, C., Nahreini, P., Thevelein, J. & Saerens, S. *United States patent US 13701247 A2* (2013).
7. Warner, J.R., Reeder, P.J., Karimpour-Fard, A., Woodruff, L.B. & Gill, R.T. *Nat Biotechnol* **28**, 856-862 (2010).
